# Supplementary material for: Distinct Fractions of an Artemisia scoparia Extract Contain Compounds With Novel Adipogenic Bioactivity
Source: PubMed Central journal article supplement (PMC6418310; doi:10.3389/fnut.2019.00018), 2019-03-08
Supplement: Data_Sheet_1.pdf [file Data_Sheet_1.pdf]

*Supplementary Material*

**Distinct fractions of an *Artemisia scoparia* extract contain compounds with novel adipogenic bioactivity.**

**Anik Boudreau<sup>1</sup>, Alexander Poulev<sup>3</sup>, David M. Ribnicky<sup>3</sup>, Ilya Raskin<sup>3</sup>, Thirumurugan Rathinasabapathy<sup>3</sup>, Allison J. Richard<sup>1</sup>, and Jacqueline M. Stephens<sup>1,2\*</sup>**

**\* Correspondence:**

Jacqueline Stephens

Louisiana State University

Pennington Biomedical Research Center

6400 Perkins Road

Baton Rouge, LA 70808

Phone (225)-763-2648

FAX (225)-578-2597

[jsteph1@lsu.edu](mailto:jsteph1@lsu.edu)

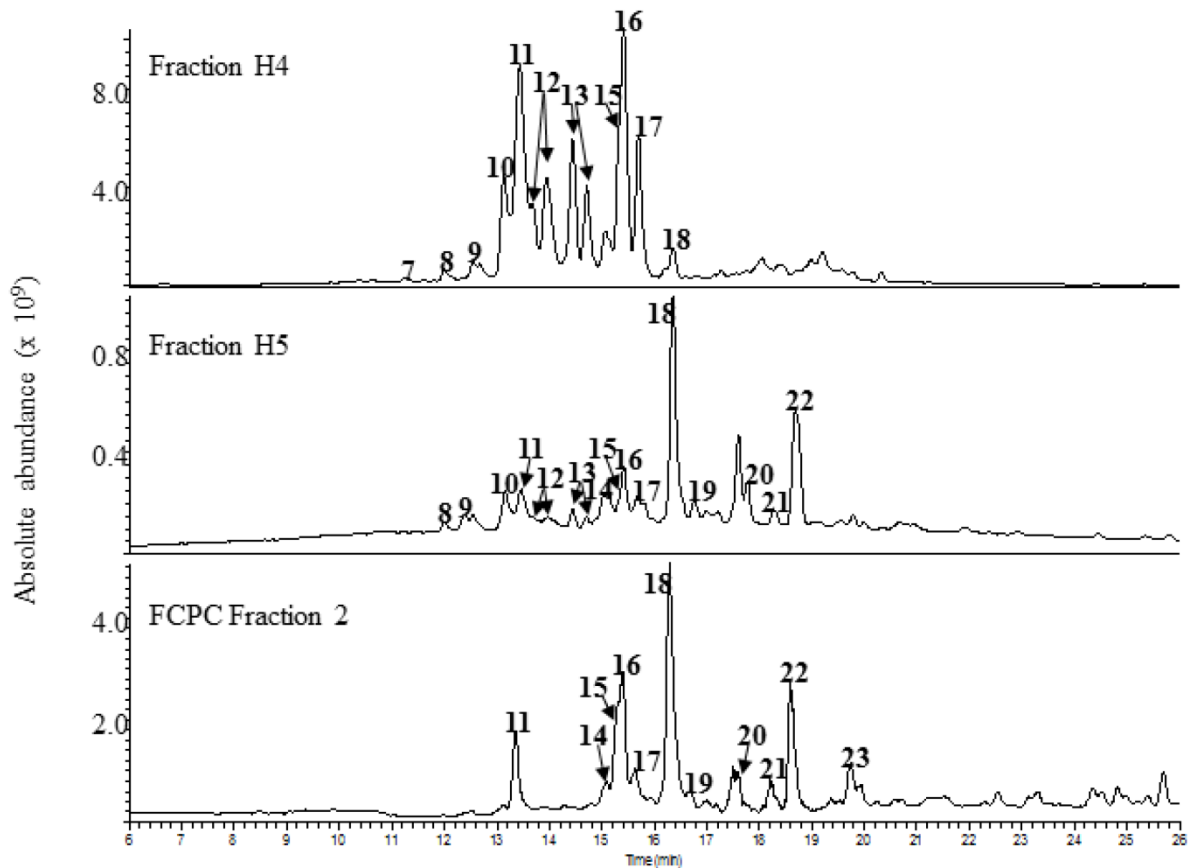

**Supplementary Figure 1. (-)ESI MS total ion current chromatograms of three fractions of EA with pro-adipogenic activity. Peak identification is shown in table 2.**

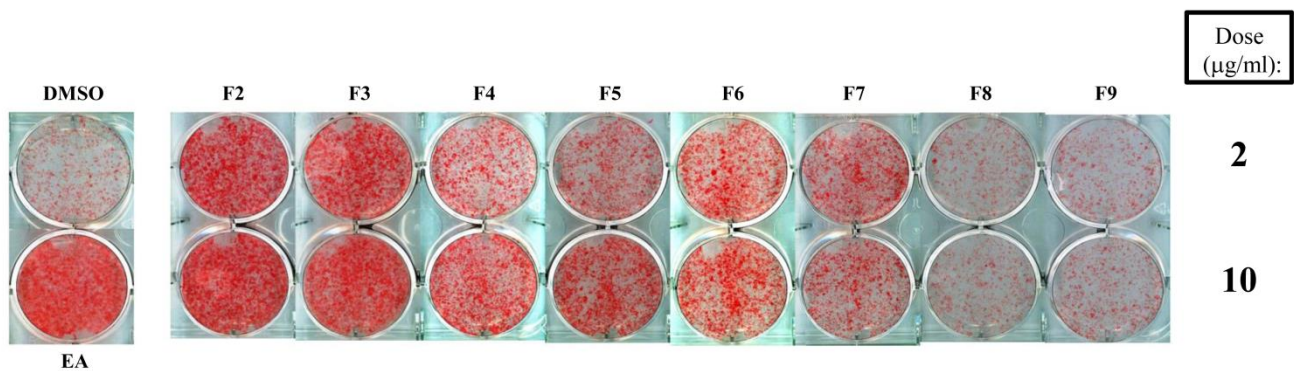

**Figure S2. Adipogenesis in 3T3-L1 cells is enhanced by FCPC subfractions of EA.** Cells were induced to differentiate using half-strength MDI cocktail containing DMSO vehicle, 20 µg/ml of EA, or 2 or 10 µg/ml of each FCPC subfraction of EA. 4 days after induction, cells were fixed, stained with Oil Red O, and scanned. Wells were treated and stained in triplicate; images shown are from one representative well for each condition.

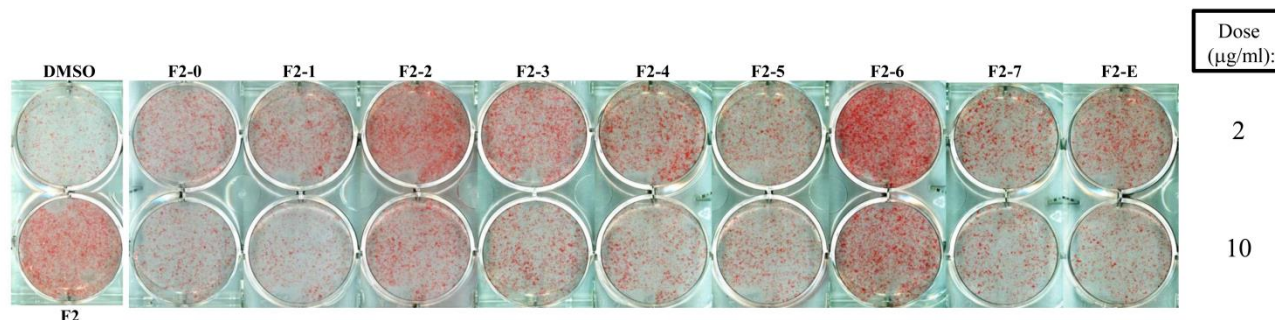

**Figure S3. Adipogenesis in 3T3-L1 cells is enhanced by subfractions of EA-F2.** Cells were induced to differentiate using half-strength MDI cocktail containing DMSO vehicle, 10  $\mu\text{g/ml}$  of F2, or 2 or 10  $\mu\text{g/ml}$  of each EA-F2 subfraction. 4 days after induction, cells were fixed, stained with Oil Red O, and scanned. Wells were treated and stained in triplicate; images shown are from one representative well for each condition.

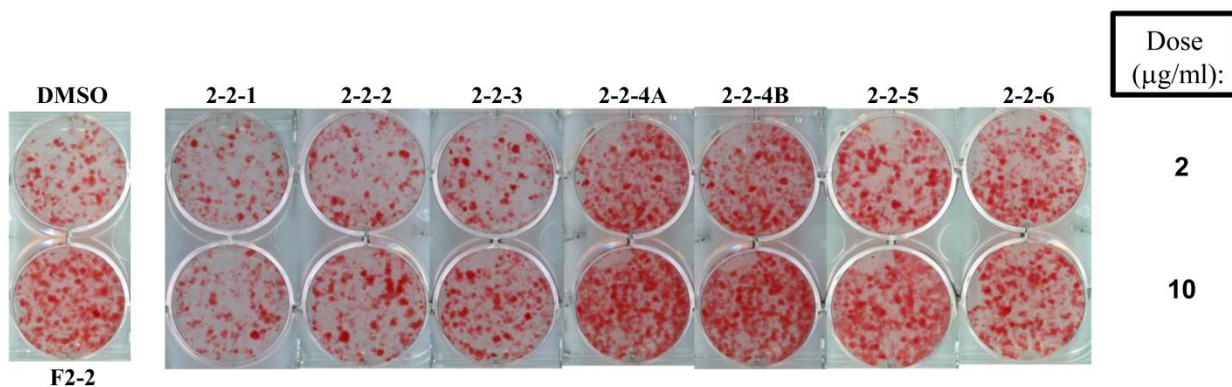

**Figure S4. Adipogenesis in 3T3-L1 cells is enhanced by subfractions of EA-F2-2.** Cells were induced to differentiate using half-strength MDI cocktail containing DMSO vehicle, 10  $\mu\text{g/ml}$  of F2-2, or 5 or 20  $\mu\text{g/ml}$  of each EA-F2 subfraction. 4 days after induction, cells were fixed, stained with Oil Red O, and scanned. Wells were treated and stained in triplicate; images shown are from one representative well for each condition.
